# Supplementary material for: Interaction between access choice and pharmacotherapy for coronary intervention: the results of a UK survey
Source: HighWire-hosted journal article supplement (doi:10.1136/openhrt-2014-000094), 2014-06-01
Supplement: openhrt-2014-000094supp.pdf [file openhrt-2014-000094supp.pdf]

## **Appendix 1**

**1. What is your default access for elective angioplasty?**

Radial/femoral

**2. What is your default access for NSTEMI PCI?**

Radial/femoral

**3. What is your default access for PPCI?**

Radial/femoral

**4. If you fail at radial access (for default radial operators) where do you go next?**

Other radial/femoral

**5. Which anti-platelet do you use for NSTEMI PCI?**

Clopidogrel/prasugrel/ticagrelor/tailored (individualized therapy)

**6. Which anti-platelet do you use for PPCI?**

Clopidogrel/prasugrel/ticagrelor/tailored (individualized therapy)

**7. What is your routine adjunctive pharmacology for stable angina PCI (multiple ticks allowed)**

Unfractionated heparin/LMWH/glycoprotein inhibitor bail-out/bivalirudin bail-out

**8. What is your routine adjunctive pharmacology for NSTEMI PCI (multiple ticks allowed)?**

Unfractionated heparin/LMWH/glycoprotein inhibitors/glycoprotein inhibitors for bail-out/bivalirudin/bivalirudin for bail-out

**9. What is your routine adjunctive pharmacology for PPCI (multiple ticks allowed)?**

Unfractionated heparin/LMWH/glycoprotein inhibitors/glycoprotein inhibitors for bail-out/bivalirudin/bivalirudin for bail-out

**10. What year did you qualify?**
